# Supplementary material
Source: PubMed Central journal article supplement (PMC7247031)
Supplement: Supp_Data-Fig1.pdf [file Supp_Data-Fig1.pdf]

## Supplementary Data

### Supplementary Data S1. Complete Search Strategy and Results for Each Included Database.

#### Ovid-Medline

(exp Diabetes, Gestational/ OR GDM.mp. OR pregnancy induced diabetes.mp. OR pregnancy diabetes.mp. OR diabetes mellitus gravidarum.mp.) AND (exp postpartum period/ OR postpartum.mp. OR puerperium.mp. OR puerperal.mp. OR post-delivery.mp. OR postnatal.mp.) AND (exp glucose tolerance test/ OR fasting plasma glucose.mp. OR oral glucose tolerance.mp. OR ((diabetes OR glucose OR glycemc OR hemoglobin A1C OR A1C OR HbA1C) adj3 (screening\* OR test\*)))

=523 results, 481 after limiting to English on 2/14/17; additional 84 results on 10/12/18

#### Embase

('pregnancy diabetes mellitus'/exp OR 'GDM' OR 'pregnancy induced diabetes' OR 'pregnancy diabetes' OR 'diabetes mellitus gravidarum') AND ('puerperium'/exp OR postpartum OR puerperium OR puerperal OR post-delivery OR postnatal) AND ('oral glucose tolerance test'/exp OR 'fasting plasma glucose' OR 'oral glucose tolerance' OR ((diabetic OR glucose OR glycemc OR 'hemoglobin A1C' OR 'HbA1C' OR 'A1c') NEAR/3 (screening\* OR test\*)))

=1,057 results, 971 after limiting to English on 2/14/17; additional 234 results on 10/12/18

#### CINAHL

((MH "Diabetes Mellitus, Gestational") OR "GDM" OR "pregnancy induced diabetes" OR "pregnancy diabetes" OR "diabetes mellitus gravidarum") AND ((MH "Postnatal Period") OR postpartum OR puerperium OR puerperal OR post-delivery OR postnatal) AND (((("fasting plasma glucose" OR "oral glucose tolerance" OR ((diabetes OR glucose OR glycemc OR "hemoglobin A1c" OR "HbA1C" OR "A1c") N3 (screening\* OR test\*)))

=252 results, 257 after limiting to English on 2/14/17; additional 44 results on 10/12/18

#### Cochrane Library

[mh Diabetes, Gestational] OR "GDM" OR "pregnancy induced diabetes" OR "pregnancy diabetes" OR "diabetes mellitus gravidarum") AND ([mh postpartum period] OR postpartum OR puerperium OR puerperal OR post-delivery OR postnatal) AND ([mh glucose tolerance test] OR "glucose tolerance test" OR "fasting plasma glucose" OR "oral glucose tolerance" OR ((diabetes OR glucose OR glycemc OR hemoglobin A1C OR A1C OR HbA1C) adj3 (screening\* OR test\*)))

=106 results (42 Cochrane reviews, 3 DARE reviews, 56 CENTRAL trials, 1 technology assessment, and 4 economic evaluations) on 2/15/2017; additional 62 results as of 10/12/18 (20 Cochrane Reviews, 41 CENTRAL Trials, 1 Cochrane protocol)

#### Scopus

TITLE-ABS-KEY ("GDM" OR "pregnancy induced diabetes" OR "pregnancy diabetes" OR "diabetes mellitus gravidarum") AND TITLE-ABS-KEY (postpartum OR puerperium OR puerperal OR post-delivery OR postnatal) AND TITLE-ABS-KEY ("glucose tolerance test" OR "fasting plasma glucose" OR "oral glucose tolerance" OR ((diabetes OR glucose OR glycemc OR "hemoglobin A1C" OR A1C OR HbA1C) W/3 (screening\* OR test\*)))

=852 results, 758 after limiting to English on 2/15/17; additional 136 results on 10/12/18

#### Proquest Dissertations & Theses

TI, AB ("GDM" OR "pregnancy induced diabetes" OR "pregnancy diabetes" OR "diabetes mellitus gravidarum") AND TI, AB (postpartum OR puerperium OR puerperal OR post-delivery OR postnatal) AND TI, AB ("glucose tolerance test" OR "fasting plasma glucose" OR "oral glucose tolerance" OR "diabetes test" OR "diabetes screening" OR "glucose test" OR "glucose screening" OR "hemoglobin A1c" OR "HbA1C" OR "A1C")

=12 results, 11 after limiting to English on 2/15/17; no additional results on 10/12/18

#### Clinical Trials.Gov

("GDM" OR "pregnancy diabetes") AND (postpartum OR postnatal OR post-delivery) AND ("diabetes test" OR "diabetes screening" OR "glucose screening" OR "HbA1c" OR "A1c")

=62 results on 2/15/17; additional 24 results on 10/12/18

### Supplementary Data S2. Data extraction form

Study Authors  
Year of Publication  
Data year start  
Data year stop  
Intervention (Y/N)?  
Study Method (cross-sectional, retrospective cohort, prospective cohort, case control, randomized controlled trial)  
How was GDM Identified?  
Data Source/Study Setting  
Screening Time Frame  
Tests used in postpartum screening  
Total Population

# women with GDM  
# women screened  
% women screened

White Population

# women with GDM  
# women screened  
% women screened

Black Population

# women with GDM  
# women screened  
% women screened

Hispanic Population

# women with GDM  
# women screened  
% women screened

Asian Population

# women with GDM  
# women screened  
% women screened

Other Population

# women with GDM  
# women screened  
% women screened

Confounding assessed (Y/N)

Methods used to assess confounding (stratification, matching, multivariable regression, propensity scores)

Confounders assessed (column for each confounder with Y/N)

Definition of how exposure (race/ethnicity) was assessed (self-report, birth certificate, medical record extraction, geographic information systems, not recorded)

Quality review questions from NHLBI form (Supplementary Table S1)

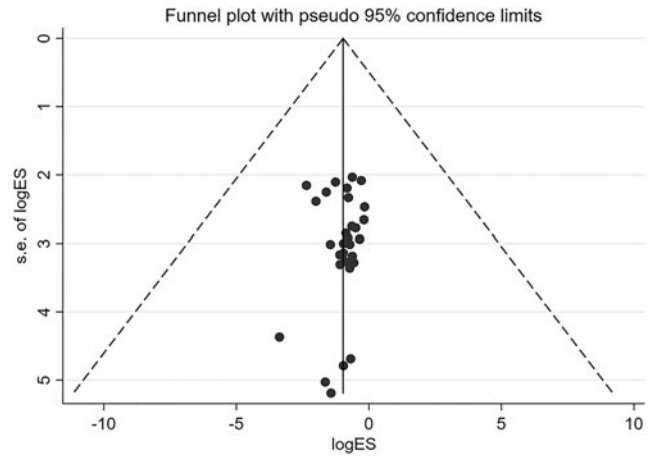

**SUPPLEMENTARY FIG. S1.** Funnel plot to assess for small study effects.
